# Supplementary material for: Increasing protein production by directed vector backbone evolution
Source: PubMed Central journal article supplement (PMC3750827; doi:10.1186/2191-0855-3-39), 2013-07-26
Supplement: 2191-0855-3-39-S1.pdf [file 2191-0855-3-39-S1.pdf]

## Supplementary Material

# Increasing protein production by directed vector backbone evolution

Felix Jakob<sup>1,2,A</sup>, Christian Lehmann<sup>1,A</sup>, Ronny Martinez<sup>1</sup> and Ulrich Schwaneberg<sup>1,2\*</sup>

<sup>1</sup>RWTH Aachen University, Worringerweg 1, 52074 Aachen, Germany

<sup>2</sup>DWI an der RWTH Aachen e.V., Forckenbeckstraße 50, 52056 Aachen, Germany

<sup>A</sup>These authors contributed equally to this work

\*Corresponding author:

Prof. Dr. Ulrich Schwaneberg

RWTH Aachen University

Lehrstuhl für Biotechnologie

Worringerweg 1

52074 Aachen, Germany

Tel.: +49-241-80 24176

Fax: +49-241-80 22387

E-Mail: [u.schwaneberg@biotec.rwth-aachen.de](mailto:u.schwaneberg@biotec.rwth-aachen.de)

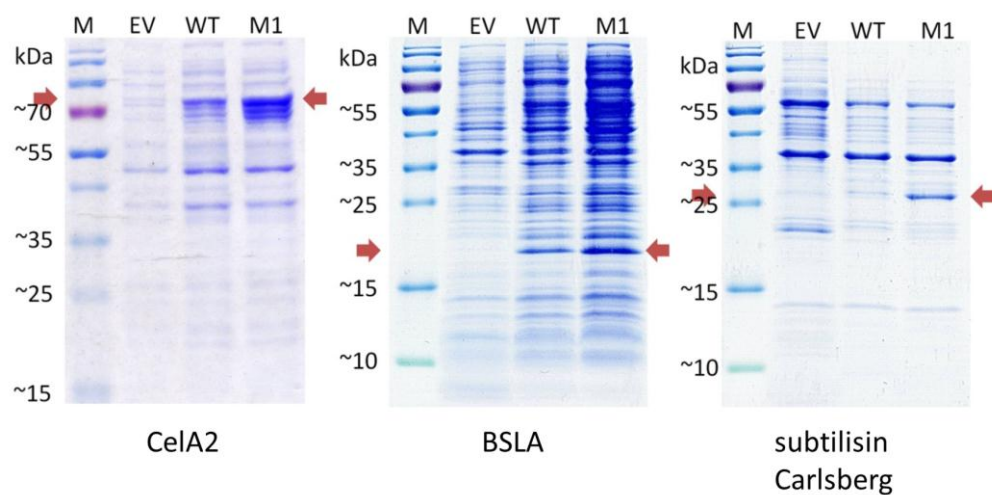

**Figure S1:** SDS-PAGE of produced cellulase (CelA2), lipase (BSLA) and protease (subtilisin Carlsberg). EV: empty vector control; WT: non-optimized vector constructs; M1: epMEGAWHOP optimized vector constructs. Red arrows indicate the bands of target proteins.

**Figure S2:** Sequencing results: Alignments of all three vector systems compared to the corresponding 'parents':

**pET28a(+)-CelA2 & pET28a(+)-M1-CelA2**

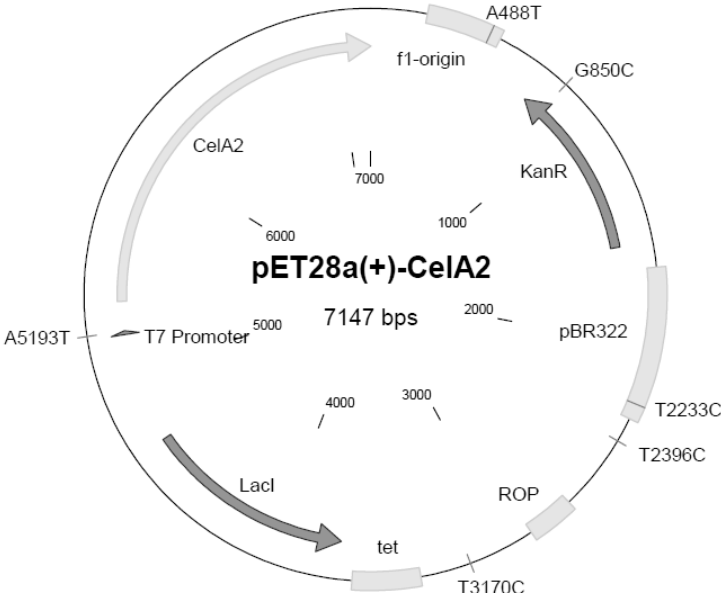

```

pET28a (+) -CelA2      1 gaattcgagctccgtcgacaagcttgcgggccgactcgagcaccaccaccaccactg
pET28a (+) -M1        1 .....

pET28a (+) -CelA2     61 agatccggctgctaacaaagcccgaaaggaagctgagttggctgctgccaccgctgagca
pET28a (+) -M1       61 .....

pET28a (+) -CelA2    121 ataactagcataacccttggggcctctaaacgggtcttgaggggttttttgcgaaag
pET28a (+) -M1     121 .....

pET28a (+) -CelA2    181 aggaactatatccggattggcgaatgggacgcgccctgtagcggcgcatgaagcggcg
pET28a (+) -M1     181 .....

pET28a (+) -CelA2    241 ggtgtggtggttacgcgcagcgtgaccgctacacttgccagcgccttagcggccgctcct
pET28a (+) -M1     241 .....

pET28a (+) -CelA2    301 ttcgctttcttcccttcccttctcgccacgcttgcggcgtttccccgctcaagctctaaat
pET28a (+) -M1     301 .....

pET28a (+) -CelA2    361 cgggggctcccttaggggtccgatttagtgctttacggcacctcgaccccaaaaactt
pET28a (+) -M1     361 .....

pET28a (+) -CelA2    421 gattagggatgattcagctagtgggccatcgccctgatagacgggttttgcgctttg
pET28a (+) -M1     421 .....

pET28a (+) -CelA2    481 acgttggagtccacgttctttaatagtgactcttgttccaaactggaacaactcaac
pET28a (+) -M1     481 .....t.....

pET28a (+) -CelA2    541 cctatctcgggtctattcttttgatttataagggattttgccgatttcggcctattggtta
pET28a (+) -M1     541 .....

pET28a (+) -CelA2    601 aaaaatgagctgatttaacaaaaatataacgcgaattttaacaaaatattaacgcttaca
pET28a (+) -M1     601 .....

pET28a (+) -CelA2    661 attaggtggcacttttcggggaaatgtgcgcggaaccctatttgtttattttctaaa
pET28a (+) -M1     661 .....

pET28a (+) -CelA2    721 tacattcaaatatgtatccgctcatgaattaattcttagaaaaactcatcgagcatcaa
pET28a (+) -M1     721 .....

pET28a (+) -CelA2    781 tgaaactgcaatttattcatatcaggattatcaataccatattttgaaaagccggttc
pET28a (+) -M1     781 .....

pET28a (+) -CelA2    841 tgtaatgaaggagaaaaactcaccgaggcagttccataggatggcaagatcctggtatcgg
pET28a (+) -M1     841 .....c.....

pET28a (+) -CelA2    901 tctgcatccgactcgtccaacatcaatacaacctattaatttccctcgtcaaaaata
pET28a (+) -M1     901 .....

pET28a (+) -CelA2    961 aggttatcaagtgagaaatcaccatgagtgacgactgaatccggtgagaatggcaaaagt
pET28a (+) -M1     961 .....

pET28a (+) -CelA2   1021 ttatgcatttcttccagacttgttcaacaggccagccattacgctcgtcatcaaaatca
pET28a (+) -M1    1021 .....

```

|                   |      |                                                               |
|-------------------|------|---------------------------------------------------------------|
| pET28a (+) -CelA2 | 1081 | ctcgcatcaaccaaaccggtatttcattcgtgattgcgctgagcgagacgaaatcgcga   |
| pET28a (+) -M1    | 1081 | .....                                                         |
| pET28a (+) -CelA2 | 1141 | tcgctgtttaaaggacaattacaacacaggaatcgaatgcaaccggcgaggaacactgcc  |
| pET28a (+) -M1    | 1141 | .....                                                         |
| pET28a (+) -CelA2 | 1201 | agcgcatcaacaatattttcacctgaatcaggatattcttctaatacctggaatgctgtt  |
| pET28a (+) -M1    | 1201 | .....                                                         |
| pET28a (+) -CelA2 | 1261 | ttcccggggatcgagtggtgagtaacatgcatcatcaggagtagcgataaaatgcttg    |
| pET28a (+) -M1    | 1261 | .....                                                         |
| pET28a (+) -CelA2 | 1321 | atggtcggaagaggcataaattccgtcagccagtttagtctgaccatctcatctgtaaca  |
| pET28a (+) -M1    | 1321 | .....                                                         |
| pET28a (+) -CelA2 | 1381 | tcattggcaacgctacctttgccatgtttcagaaacaactctggcgcatcgggcttccca  |
| pET28a (+) -M1    | 1381 | .....                                                         |
| pET28a (+) -CelA2 | 1441 | tacaatcgatagattgtcgcacctgattgcccgacattatcgcgagcccatttataccca  |
| pET28a (+) -M1    | 1441 | .....                                                         |
| pET28a (+) -CelA2 | 1501 | tataaatcagcatccatggttgaatttaatcgcggcctagagcaagacgtttcccggtga  |
| pET28a (+) -M1    | 1501 | .....                                                         |
| pET28a (+) -CelA2 | 1561 | atatggctcataacacccttgtattactgtttatgtaagcagacagttttattgttcat   |
| pET28a (+) -M1    | 1561 | .....                                                         |
| pET28a (+) -CelA2 | 1621 | gacaaaaatcccttaacgtgagttttcgttccactgagcgtcagaccccgtagaaaagat  |
| pET28a (+) -M1    | 1621 | .....                                                         |
| pET28a (+) -CelA2 | 1681 | caaaggatcttcttgagatcctttttctgcgcgtaactctgctgcttgcacacaaaaa    |
| pET28a (+) -M1    | 1681 | .....                                                         |
| pET28a (+) -CelA2 | 1741 | accaccgctaccagcgggtgtttgtttgccgatcaagagctaccaactcttttccgaa    |
| pET28a (+) -M1    | 1741 | .....                                                         |
| pET28a (+) -CelA2 | 1801 | ggtaactggcttcagcagagcgcagataccaaatactgtccttctagtgtagccgtagtt  |
| pET28a (+) -M1    | 1801 | .....                                                         |
| pET28a (+) -CelA2 | 1861 | aggccaccacttcaagaactctgtagcaccgcctacatacctcgctctgtaatacctgtt  |
| pET28a (+) -M1    | 1861 | .....                                                         |
| pET28a (+) -CelA2 | 1921 | accagtggctgctgccagtgccgataagtcgtgtcttaccgggttgactcaagacgata   |
| pET28a (+) -M1    | 1921 | .....                                                         |
| pET28a (+) -CelA2 | 1981 | gttaccggataagggcgcagcggctcgggctgaacggggggtcgtgcacacagcccagctt |
| pET28a (+) -M1    | 1981 | .....                                                         |
| pET28a (+) -CelA2 | 2041 | ggagcgaacgacctacaccgaactgagatacctacagcgtgagctatgagaaagcggccac |
| pET28a (+) -M1    | 2041 | .....                                                         |
| pET28a (+) -CelA2 | 2101 | gcttcccgaaggagaaaggcggacaggtatccggtaagcggcagggctcggaacaggaga  |
| pET28a (+) -M1    | 2101 | .....                                                         |
| pET28a (+) -CelA2 | 2161 | gcgcacgaggagcttccaggggaaacgcctggatctttatagtcctgtcgggttctg     |
| pET28a (+) -M1    | 2161 | .....                                                         |
| pET28a (+) -CelA2 | 2221 | ccacctctgacttgagcgtcgatttttgtgatgctcgtcagggggggcggagcctatggaa |
| pET28a (+) -M1    | 2221 | .....c.....                                                   |
| pET28a (+) -CelA2 | 2281 | aaacgccagcaacgcggcctttttacggttctctggccttttctggccttttctcacat   |
| pET28a (+) -M1    | 2281 | .....                                                         |
| pET28a (+) -CelA2 | 2341 | gttctttctcgtgttatccctgattctgtggataaccgtattaccgcctttgagtgagc   |
| pET28a (+) -M1    | 2341 | .....c.....                                                   |
| pET28a (+) -CelA2 | 2401 | tgataccgctcgcgcagccgaacgaccgagcgcagcagtcagtgagcaggaagcggga    |
| pET28a (+) -M1    | 2401 | .....                                                         |

|                   |      |                                                              |
|-------------------|------|--------------------------------------------------------------|
| pET28a (+) -CelA2 | 2461 | agagcgctgatgcggtatTTTTCTCTTACGCATCTGTGCGGTATTTACACCGCAATGG   |
| pET28a (+) -M1    | 2461 | .....                                                        |
| pET28a (+) -CelA2 | 2521 | TGCACCTCTCAGTACAATCTGCTCTGATGCCGATAGTTAAGCCAGTATACTCCGCTAT   |
| pET28a (+) -M1    | 2521 | .....                                                        |
| pET28a (+) -CelA2 | 2581 | CGCTACGTGACTGGGTCATGGCTGCGCCCCGACCCCGCCAACACCCGCTGACGCGCCT   |
| pET28a (+) -M1    | 2581 | .....                                                        |
| pET28a (+) -CelA2 | 2641 | GACGGGCTTGTCTGCTCCCGCATCCGCTTACAGACAAGCTGTGACCGTCTCCGGGAGCT  |
| pET28a (+) -M1    | 2641 | .....                                                        |
| pET28a (+) -CelA2 | 2701 | GCATGTGTCAGAGGTTTTACCCTCATCACCGAAACGCGGAGGAGCTGCGGTAAGCT     |
| pET28a (+) -M1    | 2701 | .....                                                        |
| pET28a (+) -CelA2 | 2761 | CATCAGCTGGTCTGTAAGCGATTACAGATGTCTGCCTGTTCCCGCTCCAGCTCGT      |
| pET28a (+) -M1    | 2761 | .....                                                        |
| pET28a (+) -CelA2 | 2821 | TGAGTTTCTCCAGAAGCGTTAATGTCTGGCTTCTGATAAAGCGGGCCATGTTAAGGGCGG |
| pET28a (+) -M1    | 2821 | .....                                                        |
| pET28a (+) -CelA2 | 2881 | TTTTTCTGTTTGGTCACTGATGCCTCCGTGAAGGGGATTTCTGTTTCAATGGGGTAA    |
| pET28a (+) -M1    | 2881 | .....                                                        |
| pET28a (+) -CelA2 | 2941 | TGATAACCGATGAAACGAGAGGAGTGTCCAGATACGGTTACTGATGATGAACATGCC    |
| pET28a (+) -M1    | 2941 | .....                                                        |
| pET28a (+) -CelA2 | 3001 | GGTACTGGAACGTTGTGAGGGTAACAACCTGGCGGTATGGATGCGCGGGACCAGAGAA   |
| pET28a (+) -M1    | 3001 | .....                                                        |
| pET28a (+) -CelA2 | 3061 | AAATCACTCAGGGTCAATGCCAGCGCTTCGTTAATACAGATGTAGGTGTTCCACAGGGTA |
| pET28a (+) -M1    | 3061 | .....                                                        |
| pET28a (+) -CelA2 | 3121 | GCCAGCAGCATCTCGCATGCAGATCCGGAACATAATGGTGCAGGGCGCTGACTTCCGCG  |
| pET28a (+) -M1    | 3121 | .....                                                        |
| pET28a (+) -CelA2 | 3181 | TTCCAGACTTACGAAACCGGAAACCGAAGACCATTCATGTTGTTGCTCAGTGCAG      |
| pET28a (+) -M1    | 3181 | .....                                                        |
| pET28a (+) -CelA2 | 3241 | ACGTTTTGCAGCAGCAGTCGCTTCCAGTTCGCTCGCTATCGGTGATTCATTCTGCTAAC  |
| pET28a (+) -M1    | 3241 | .....                                                        |
| pET28a (+) -CelA2 | 3301 | CAGTAAGGCAACCCCGCCAGCCTAGCCGGTCTCAACGACAGGAGCACGATCATGCGCA   |
| pET28a (+) -M1    | 3301 | .....                                                        |
| pET28a (+) -CelA2 | 3361 | CCCGTGGGGCCCGCATGCCGGCGATAATGGCCTGCTTCTCGCCGAAACGTTTGGTGGCGG |
| pET28a (+) -M1    | 3361 | .....                                                        |
| pET28a (+) -CelA2 | 3421 | GACCAGTGACGAAGGCTTGAGCGAGGGCGTGAAGATTCCGAATACCGCAAGCGACAGGC  |
| pET28a (+) -M1    | 3421 | .....                                                        |
| pET28a (+) -CelA2 | 3481 | CGATCATCGTCGCGCTCCAGCGAAAGCGGTCCTCGCCGAAAATGACCCAGAGCGCTGCGG |
| pET28a (+) -M1    | 3481 | .....                                                        |
| pET28a (+) -CelA2 | 3541 | GCACCTGTCTACGAGTTGCATGATAAAGAAGACAGTCATAAGTGCGGCGACGATAGTCA  |
| pET28a (+) -M1    | 3541 | .....                                                        |
| pET28a (+) -CelA2 | 3601 | TGCCCCGCGCCACCAGGAGGAGTACTGGGTTGAAGGCTCTCAAGGGCATCGGTCGAG    |
| pET28a (+) -M1    | 3601 | .....                                                        |
| pET28a (+) -CelA2 | 3661 | ATCCCGGTGCCTAATGAGTGAGCTAACTTACATTAATTGCGTTGCGCTCACTGCCCGCTT |
| pET28a (+) -M1    | 3661 | .....                                                        |
| pET28a (+) -CelA2 | 3721 | TCCAGTCGGGAAACCTGCTGCGTCCAGCTGCATTAATGAATCGGCCAACGCGGGGAGAG  |
| pET28a (+) -M1    | 3721 | .....                                                        |
| pET28a (+) -CelA2 | 3781 | GCGGTTTGCATATTGGGCGCCAGGTTGTTTTCTTTCCACAGTGAGACGGGCAACAGC    |
| pET28a (+) -M1    | 3781 | .....                                                        |

|                   |      |                                                               |
|-------------------|------|---------------------------------------------------------------|
| pET28a (+) -CelA2 | 3841 | tgattgcccttcaccgcctggccctgagagagttgcagcaagcgggtccacgctgggttgc |
| pET28a (+) -M1    | 3841 | .....                                                         |
| pET28a (+) -CelA2 | 3901 | cccagcagggcgaaaatcctgtttgatggtggttaacggcgggatataacatgagctgtct |
| pET28a (+) -M1    | 3901 | .....                                                         |
| pET28a (+) -CelA2 | 3961 | tcggtatcgctgatcccactaccgagatatccgcaccaacgcgcagcccggactcggta   |
| pET28a (+) -M1    | 3961 | .....                                                         |
| pET28a (+) -CelA2 | 4021 | atggcgcgcattgcccagcgcctatctgatcgttggaaccagcatcgcagtggaacg     |
| pET28a (+) -M1    | 4021 | .....                                                         |
| pET28a (+) -CelA2 | 4081 | atgccctcattcagcatttgcattggttggtaaaccggacatggcactccagtccct     |
| pET28a (+) -M1    | 4081 | .....                                                         |
| pET28a (+) -CelA2 | 4141 | tcccgttccgctatcggctgaatttgatgagtgagatatttatgccagccagccaga     |
| pET28a (+) -M1    | 4141 | .....                                                         |
| pET28a (+) -CelA2 | 4201 | cgcagacgcgcgagacagaacttaattggcccgcctaacagcgcgatttgcgtgagacc   |
| pET28a (+) -M1    | 4201 | .....                                                         |
| pET28a (+) -CelA2 | 4261 | aatgcgaccagatgctccacgccagtcgcgtaccgtcttcatgggagaaaataatactg   |
| pET28a (+) -M1    | 4261 | .....                                                         |
| pET28a (+) -CelA2 | 4321 | ttgatgggtgctcggtcagagacatcaagaaataacgccgaacattagtcagggcagct   |
| pET28a (+) -M1    | 4321 | .....                                                         |
| pET28a (+) -CelA2 | 4381 | tccacagcaatggcatcctggtcatccagcggatagttaatgatcagcccactgacgcgt  |
| pET28a (+) -M1    | 4381 | .....                                                         |
| pET28a (+) -CelA2 | 4441 | tgcgcgagaagattgtgcaccgcgctttacaggcttcgacgcgcgcttcggttctaccatc |
| pET28a (+) -M1    | 4441 | .....                                                         |
| pET28a (+) -CelA2 | 4501 | gacaccaccagctggcaccagttgatcggcgcgagatttaatcgccgcgacaatttgc    |
| pET28a (+) -M1    | 4501 | .....                                                         |
| pET28a (+) -CelA2 | 4561 | gacggcgcgtgcagggccagactggaggtggcaacccaatcagcaacgactgtttgcc    |
| pET28a (+) -M1    | 4561 | .....                                                         |
| pET28a (+) -CelA2 | 4621 | gccagttggtgtgccacgcggttgggaatgtaattcagctccgccatcgccgcttccact  |
| pET28a (+) -M1    | 4621 | .....                                                         |
| pET28a (+) -CelA2 | 4681 | tttcccgcgttttcgcagaaacgtggctggcctggttcaccacgcgggaaacggtctga   |
| pET28a (+) -M1    | 4681 | .....                                                         |
| pET28a (+) -CelA2 | 4741 | taagagacaccggcactactctgcgacatcgtataacgttactggtttcacattcaccacc |
| pET28a (+) -M1    | 4741 | .....                                                         |
| pET28a (+) -CelA2 | 4801 | ctgaattgactctctccggcgctatcatgccataccgcgaaagggttttgcgccattcg   |
| pET28a (+) -M1    | 4801 | .....                                                         |
| pET28a (+) -CelA2 | 4861 | atggtgtccgggatctcgacgctctcccttatgcgactcctgcattaggaagcagcccag  |
| pET28a (+) -M1    | 4861 | .....                                                         |
| pET28a (+) -CelA2 | 4921 | tagtaggttgaggccgttgagcacccgcgcaaggatggtgcatgcaaggagatggc      |
| pET28a (+) -M1    | 4921 | .....                                                         |
| pET28a (+) -CelA2 | 4981 | gcccacagctccccggccacggggcctgccaccatacccacgccgaaacaagcgtcat    |
| pET28a (+) -M1    | 4981 | .....                                                         |
| pET28a (+) -CelA2 | 5041 | gagccccgaagtggcgagcccgatcttcccctcggtgatgtcggcgataataggcgcagc  |
| pET28a (+) -M1    | 5041 | .....                                                         |
| pET28a (+) -CelA2 | 5101 | aaccgcacctgtggcgcggtgatgccggccacgatgcgtccggcgtagaggatcgagat   |
| pET28a (+) -M1    | 5101 | .....                                                         |
| pET28a (+) -CelA2 | 5161 | ctcgatcccgcgaaattaatacgcactcactataggggaattgtgagcggataacaattcc |
| pET28a (+) -M1    | 5161 | .....t.....                                                   |

|                   |      |                                                               |
|-------------------|------|---------------------------------------------------------------|
| pET28a (+) -CelA2 | 5221 | cctctagaaataatTTTgTTTaaCTTTaagaaggagatataccatgggtagcagccatca  |
| pET28a (+) -M1    | 5221 | .....                                                         |
| pET28a (+) -CelA2 | 5281 | ccaccatcatcatagcagcggTgaaatctgtatTTTcagggTgctagcatgagcgaaga   |
| pET28a (+) -M1    | 5281 | .....                                                         |
| pET28a (+) -CelA2 | 5341 | atggcagacctatgaaaaagaattaccatgatgtatgaagatgataccctggcagcgtt   |
| pET28a (+) -M1    | 5341 | .....                                                         |
| pET28a (+) -CelA2 | 5401 | ttgTTTTaatctgggtgTtcatggTgaaccgaccgaagTtgatgaatTTTTatTTTga    |
| pET28a (+) -M1    | 5401 | .....                                                         |
| pET28a (+) -CelA2 | 5461 | TgattTTaatctggTgatgaccgaaggcaccctgccggaagaagaaaaagaaatccgat   |
| pET28a (+) -M1    | 5461 | .....                                                         |
| pET28a (+) -CelA2 | 5521 | tcgcctgaatcagattggttatcgtccggaagataataaagTggcctTTTgtgatTTcaga |
| pET28a (+) -M1    | 5521 | .....                                                         |
| pET28a (+) -CelA2 | 5581 | TgaacgtacctTTcgcctgtataccgaagatgatcagctggTTTTaccggtaactctgag  |
| pET28a (+) -M1    | 5581 | .....                                                         |
| pET28a (+) -CelA2 | 5641 | cctgtatagcaaagataaagatggTaatccggTggTtgatccgaatagcggTgatattac  |
| pET28a (+) -M1    | 5641 | .....                                                         |
| pET28a (+) -CelA2 | 5701 | ccgtgcagcagatTTTaccagctTtgactataatggcaattattatgtgaaagTgcgcaa  |
| pET28a (+) -M1    | 5701 | .....                                                         |
| pET28a (+) -CelA2 | 5761 | TgatgtgagTccggTTTTggtattgccaagatgTttatgatgaagTtaccaaagccgt    |
| pET28a (+) -M1    | 5761 | .....                                                         |
| pET28a (+) -CelA2 | 5821 | gctgaaaatgTTTTattatcagcgtagcggTgaactggaagcagaatatgtTgTgaaact  |
| pET28a (+) -M1    | 5821 | .....                                                         |
| pET28a (+) -CelA2 | 5881 | gTTTgcagctgaagcaggTcataccagaaagcaagctattatgaccggatgatccggT    |
| pET28a (+) -M1    | 5881 | .....                                                         |
| pET28a (+) -CelA2 | 5941 | TtatgTgatgtTgaaattgatTtcatggTggTgTgatgatgccggTgattTTggtcg     |
| pET28a (+) -M1    | 5941 | .....                                                         |
| pET28a (+) -CelA2 | 6001 | TtatattacaccggcaagcaaagcagTtgCagatctgctgctgaccgcagaacatTTTcc  |
| pET28a (+) -M1    | 6001 | .....                                                         |
| pET28a (+) -CelA2 | 6061 | gaccaccaggaattgatTTTggcgTccggaaaaactgctggTgaaattcgttatga      |
| pET28a (+) -M1    | 6061 | .....                                                         |
| pET28a (+) -CelA2 | 6121 | actggaatggatgctgaaaatgcagaatccggaaaccggTggTgTttatcataaagTtac  |
| pET28a (+) -M1    | 6121 | .....                                                         |
| pET28a (+) -CelA2 | 6181 | cgcaaaagatcatgcaccgatgaccattctgccgatgaagataaaagTccgctgtatct   |
| pET28a (+) -M1    | 6181 | .....                                                         |
| pET28a (+) -CelA2 | 6241 | gagTccggTtagcgcacaggcaacaggtgatTTTgcagcagTtatggcctatgcatatcg  |
| pET28a (+) -M1    | 6241 | .....                                                         |
| pET28a (+) -CelA2 | 6301 | catgtataaagatattgatgaagaattTgccaatcagTgtctggatgcagcaatTTTgC   |
| pET28a (+) -M1    | 6301 | .....                                                         |
| pET28a (+) -CelA2 | 6361 | atgggaatggctggaagaaaatccgaccgTtaatcgttataccgatccgagctTTTTac   |
| pET28a (+) -M1    | 6361 | .....                                                         |
| pET28a (+) -CelA2 | 6421 | caccggcacctataatgatgttagcgcaaccgatgaacgTtattgggcagcagcagaact  |
| pET28a (+) -M1    | 6421 | .....                                                         |
| pET28a (+) -CelA2 | 6481 | gtataaaaccaccggTgatgaaaaatatctgaaatataTggaagataattatctgccgaa  |
| pET28a (+) -M1    | 6481 | .....                                                         |
| pET28a (+) -CelA2 | 6541 | accgggTTTTggTggTgaaatgggtagctatgcacatgTtgcaattctgaccaatcc     |
| pET28a (+) -M1    | 6541 | .....                                                         |



|                   |      |                                                               |
|-------------------|------|---------------------------------------------------------------|
| pET28a (+) -CelA2 | 6601 | gctgattgaagaagataccgaactgtatcagaaaacccaaaaatgcctttattaataatgc |
| pET28a (+) -M1    | 6601 | .....                                                         |
| pET28a (+) -CelA2 | 6661 | ccagagcattctgaaaatttgggaaaaagatggctataaagtggccctggattattatgt  |
| pET28a (+) -M1    | 6661 | .....                                                         |
| pET28a (+) -CelA2 | 6721 | ttggggcagcaataaagatctggcagatcgtgcaatgatgctgatttttgccgatgat    |
| pET28a (+) -M1    | 6721 | .....                                                         |
| pET28a (+) -CelA2 | 6781 | tgaaccggatccgcgttataaagaagcagttctggatcagattcattatcttctgggtcg  |
| pET28a (+) -M1    | 6781 | .....                                                         |
| pET28a (+) -CelA2 | 6841 | caatgccaatgatatttcttatgttaccgccttggcgaaaaagcgcacagaatccgca    |
| pET28a (+) -M1    | 6841 | .....                                                         |
| pET28a (+) -CelA2 | 6901 | tcacgtccgagcgcagttctggaaccaccgttccgggtatgctggttgggtccgaa      |
| pET28a (+) -M1    | 6901 | .....                                                         |
| pET28a (+) -CelA2 | 6961 | tgcagagattatgaatgaaatttgggatccggtagcagattgttgatgaaaatacacc    |
| pET28a (+) -M1    | 6961 | .....                                                         |
| pET28a (+) -CelA2 | 7021 | tccggcagctcgctatgcagatgttaccggtagctatgccaccaatgaaatttgcattta  |
| pET28a (+) -M1    | 7021 | .....                                                         |
| pET28a (+) -CelA2 | 7081 | ttggaatagtcgctggcctatgttctgggttatgtttatagcctgaataccgtggccga   |
| pET28a (+) -M1    | 7081 | .....                                                         |
| pET28a (+) -CelA2 | 7141 | ataataa                                                       |
| pET28a (+) -M1    | 7141 | .....                                                         |

**pET22b(+)-BSLA & pET22b(+)-M1-BSLA**

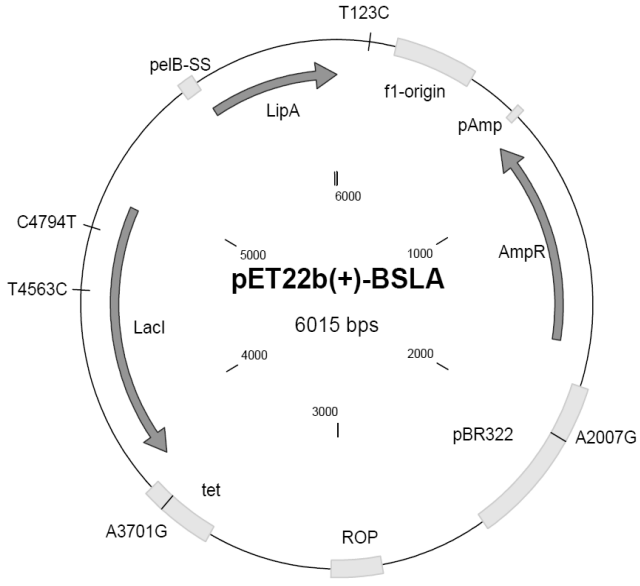

|                 |      |                                                              |
|-----------------|------|--------------------------------------------------------------|
| pET22b (+)-BSLA | 1    | tgagagctccgctcgacaagcttgccggccgactcgagcaccaccaccaccactgaga   |
| pet22b (+)-M1   | 1    | .....                                                        |
| pET22b (+)-BSLA | 61   | tccggctgctaacaagcccgaaggaagctgagttggctgctgccaccgctgagcaata   |
| pet22b (+)-M1   | 61   | .....                                                        |
| pET22b (+)-BSLA | 121  | actagcataacccttggggcctctaaacgggtcttgaggggtttttgctgaaggagg    |
| pet22b (+)-M1   | 121  | ..c.....                                                     |
| pET22b (+)-BSLA | 181  | aactatatccggattggcgaatgggacgcgcctgtagcggcgcatlaagcggcgggt    |
| pet22b (+)-M1   | 181  | .....                                                        |
| pET22b (+)-BSLA | 241  | gtggtggttacgcgcagcgtgaccgctacacttgccagcgccttagcggccgctccttc  |
| pet22b (+)-M1   | 241  | .....                                                        |
| pET22b (+)-BSLA | 301  | gctttcttcccttctttctcgccacgttcgcccggctttcccgcgtaagctctaaatcgg |
| pet22b (+)-M1   | 301  | .....                                                        |
| pET22b (+)-BSLA | 361  | gggctccctttagggttccgatttagtgctttacggcacctcgacccccaaaaacttgat |
| pet22b (+)-M1   | 361  | .....                                                        |
| pET22b (+)-BSLA | 421  | tagggatgatggttcacgtagtgggccatcgccctgatagacgggttttcgcccttgacg |
| pet22b (+)-M1   | 421  | .....                                                        |
| pET22b (+)-BSLA | 481  | ttggagtcacagttctttaatagtgactcttggttccaaactggaacaacactcaaccct |
| pet22b (+)-M1   | 481  | .....                                                        |
| pET22b (+)-BSLA | 541  | atctcggctctattcttttgattataagggattttgcccatttcggcctattggttaaaa |
| pet22b (+)-M1   | 541  | .....                                                        |
| pET22b (+)-BSLA | 601  | aatgagctgatttaacaaaaattaacgcgaattttaacaaaatattaacgcttacaatt  |
| pet22b (+)-M1   | 601  | .....                                                        |
| pET22b (+)-BSLA | 661  | taggtggcacttttcgggaaatgtgcccgaaccctatttggttatttttctaaatac    |
| pet22b (+)-M1   | 661  | .....                                                        |
| pET22b (+)-BSLA | 721  | attcaaatatgtatccgctcatgagacaataaccctgataaatgcttcaataatattgaa |
| pet22b (+)-M1   | 721  | .....                                                        |
| pET22b (+)-BSLA | 781  | aaaggaagatgatgagtattcaacatttccgtgctgcccttattccctttttgcccgc   |
| pet22b (+)-M1   | 781  | .....                                                        |
| pET22b (+)-BSLA | 841  | tttgccttctggtttttgctcaccagaaacgctggtgaaagtaaagatgctgaagatc   |
| pet22b (+)-M1   | 841  | .....                                                        |
| pET22b (+)-BSLA | 901  | agttgggtgcacgagtggttacatcgaactggatctcaacagcggtaagatccttgaga  |
| pet22b (+)-M1   | 901  | .....                                                        |
| pET22b (+)-BSLA | 961  | gttttcgccccgaagaacgttttccaatgatgagcacttttaaagttctgctatgtggcg |
| pet22b (+)-M1   | 961  | .....                                                        |
| pET22b (+)-BSLA | 1021 | cggattatcccgctattgacgccgggcaagagcaactcggctgcccatacactattctc  |
| pet22b (+)-M1   | 1021 | .....                                                        |

|                                  |      |                                                               |      |             |
|----------------------------------|------|---------------------------------------------------------------|------|-------------|
| pET22b (+)-BSLA<br>pet22b (+)-M1 | 1081 | agaatgacttggttgagtactcaccagtcacagaaaagcatcttacggatggcatgacag  | 1081 | .....       |
| pET22b (+)-BSLA<br>pet22b (+)-M1 | 1141 | taagagaattatgcagtgctgccataaccatgagtgataaactcgggccaacttacttc   | 1141 | .....       |
| pET22b (+)-BSLA<br>pet22b (+)-M1 | 1201 | tgacaacgatcggaggaccgaaggagctaaccgcttttttgcaacatgggggatcatg    | 1201 | .....       |
| pET22b (+)-BSLA<br>pet22b (+)-M1 | 1261 | taactcgccttgatcgttggaaccggagctgaatgaagccataccaaacgacgagcgtg   | 1261 | .....       |
| pET22b (+)-BSLA<br>pet22b (+)-M1 | 1321 | acaccacgatgcctgcagcaatggcaacaacgttgcgcaaactattaactggcgaactac  | 1321 | .....       |
| pET22b (+)-BSLA<br>pet22b (+)-M1 | 1381 | ttactctagcttcccggcaacaattaatagactggatggaggcgataaagttgcaggac   | 1381 | .....       |
| pET22b (+)-BSLA<br>pet22b (+)-M1 | 1441 | cacttctgcgctcggccctccggctggctggtttattgctgataaatctggagccggtg   | 1441 | .....       |
| pET22b (+)-BSLA<br>pet22b (+)-M1 | 1501 | agcgtgggtctcgcggtatcattgcagcactggggccagatggtaagccctcccgtatcg  | 1501 | .....       |
| pET22b (+)-BSLA<br>pet22b (+)-M1 | 1561 | tagttatctacacgacggggagtcaggcaactatggatgaacgaaatagacagatcgctg  | 1561 | .....       |
| pET22b (+)-BSLA<br>pet22b (+)-M1 | 1621 | agataggtgcctcactgattaagcattggttaactgtcagaccaagtttactcatatatac | 1621 | .....       |
| pET22b (+)-BSLA<br>pet22b (+)-M1 | 1681 | tttagattgatttaaaacttcatttttaatttaaaaggatctaggtgaagatcctttttg  | 1681 | .....       |
| pET22b (+)-BSLA<br>pet22b (+)-M1 | 1741 | ataatctcatgacaaaaatcccttaacgtgagttttcgttccactgagcgtcagaccccg  | 1741 | .....       |
| pET22b (+)-BSLA<br>pet22b (+)-M1 | 1801 | tagaaaagatcaaaggatcttcttgagatccttttttctgcgcgtaactctgctgcttg   | 1801 | .....       |
| pET22b (+)-BSLA<br>pet22b (+)-M1 | 1861 | aaacaaaaaacaccgctaccagcggtggtttggttgccggatcaagagctaccaactc    | 1861 | .....       |
| pET22b (+)-BSLA<br>pet22b (+)-M1 | 1921 | ttttccgaaggtaactggttcagcagagcgcagataccaataactgtccttctagtgt    | 1921 | .....       |
| pET22b (+)-BSLA<br>pet22b (+)-M1 | 1981 | agccgtagttaggccaccacttcaagaactctgtagcaccgcctacatacctcgcctctgc | 1981 | .....g..... |
| pET22b (+)-BSLA<br>pet22b (+)-M1 | 2041 | taatcctggtaccagtggtgctgccagtggcgataagtcgtgtcttacgggttgact     | 2041 | .....       |
| pET22b (+)-BSLA<br>pet22b (+)-M1 | 2101 | caagacgatagttaccggataaggcgcagcggtcgggtgaacgggggttcgtgcacac    | 2101 | .....       |
| pET22b (+)-BSLA<br>pet22b (+)-M1 | 2161 | agcccagcttgagcgaacgacctacacogaactgagatacctacagcgtgagctatgag   | 2161 | .....       |
| pET22b (+)-BSLA<br>pet22b (+)-M1 | 2221 | aaagcggcagcttcccgaaggagaaaggcggacaggtatccggtgaacggcagggtcg    | 2221 | .....       |
| pET22b (+)-BSLA<br>pet22b (+)-M1 | 2281 | gaacaggagagcgcacgaggagcttccaggggaaacgcctggtatctttatagtctcg    | 2281 | .....       |
| pET22b (+)-BSLA<br>pet22b (+)-M1 | 2341 | tcgggttcgccacctctgacttgagcgtcgatttttgtgatgctcgtcagggggcgga    | 2341 | .....       |
| pET22b (+)-BSLA<br>pet22b (+)-M1 | 2401 | gcctatggaaaaacgccagcaacgcggcctttttacggttcctggccttttgcctg      | 2401 | .....       |

|                                  |      |                                                                 |
|----------------------------------|------|-----------------------------------------------------------------|
| pET22b (+)-BSLA<br>pet22b (+)-M1 | 2461 | ttgctcacatggtcttttctgcttatcccctgattctgtggataaccgtattaccgct      |
|                                  | 2461 | .....                                                           |
| pET22b (+)-BSLA<br>pet22b (+)-M1 | 2521 | ttgagtgagctgataccgctcgccgcagccgaacgaccgagcgcagcagctcagtgagcg    |
|                                  | 2521 | .....                                                           |
| pET22b (+)-BSLA<br>pet22b (+)-M1 | 2581 | aggaagcgggaagagcgcctgatgcggtatTTTTCTCCTTACGCATCTGTGCGGTATTTTCA  |
|                                  | 2581 | .....                                                           |
| pET22b (+)-BSLA<br>pet22b (+)-M1 | 2641 | accgcaatggtgcactctcagtacaatctgctctgatgccgcatagttaagccagtatac    |
|                                  | 2641 | .....                                                           |
| pET22b (+)-BSLA<br>pet22b (+)-M1 | 2701 | actccgctatcgctacgtgactgggtcatggctgccccgaccccccaacaccgct         |
|                                  | 2701 | .....                                                           |
| pET22b (+)-BSLA<br>pet22b (+)-M1 | 2761 | gacgcccctgacgggcttctgctcctccggcatccgcttacagacaagctgtgaccgtc     |
|                                  | 2761 | .....                                                           |
| pET22b (+)-BSLA<br>pet22b (+)-M1 | 2821 | tccgggagctgcatgtgtcagaggttttaccgctcatcaccgaaacgcgcgaggcagctg    |
|                                  | 2821 | .....                                                           |
| pET22b (+)-BSLA<br>pet22b (+)-M1 | 2881 | cggtaaagctcatcagcgtggtcgtgaagcgattcacagatgtctgcctgttcatccgcg    |
|                                  | 2881 | .....                                                           |
| pET22b (+)-BSLA<br>pet22b (+)-M1 | 2941 | tccagctcgttgagtttctccagaagcgttaatgtctggcttctgataaagcgggcatg     |
|                                  | 2941 | .....                                                           |
| pET22b (+)-BSLA<br>pet22b (+)-M1 | 3001 | ttaagggcggTTTTCTGTTGGTCACTGATGCCTCCGTGTAAGGGGATTTCTGTTT         |
|                                  | 3001 | .....                                                           |
| pET22b (+)-BSLA<br>pet22b (+)-M1 | 3061 | atgggggtaatgataccgatgaaacgagagaggatgctcacgatacgggttactgatgat    |
|                                  | 3061 | .....                                                           |
| pET22b (+)-BSLA<br>pet22b (+)-M1 | 3121 | gaacatgcccggttactggaacgttgtgagggtaacaactggcggatggatgcggcgg      |
|                                  | 3121 | .....                                                           |
| pET22b (+)-BSLA<br>pet22b (+)-M1 | 3181 | gaccagagaaaaatcactcagggcctcaatgccagcgttctgtaatacagatgtaggtgtt   |
|                                  | 3181 | .....                                                           |
| pET22b (+)-BSLA<br>pet22b (+)-M1 | 3241 | ccacagggtagccagcagcatcctgcgatgcagatccggaacataatggtgcagggcgct    |
|                                  | 3241 | .....                                                           |
| pET22b (+)-BSLA<br>pet22b (+)-M1 | 3301 | gacttccgctttccagactttacgaaacacgaaaccgaagaccattcatgttgttgc       |
|                                  | 3301 | .....                                                           |
| pET22b (+)-BSLA<br>pet22b (+)-M1 | 3361 | caggtcgcagacgttttgcagcagcagctcgttccgctcgcgtatcggtgattca         |
|                                  | 3361 | .....                                                           |
| pET22b (+)-BSLA<br>pet22b (+)-M1 | 3421 | ttctgtaaccagtaaggcaaccccgccagcctagccggctcctcaacgacaggagcagc     |
|                                  | 3421 | .....                                                           |
| pET22b (+)-BSLA<br>pet22b (+)-M1 | 3481 | atcatgcgcacccgtggggccgcatgccggcgataatggcctgcttctcgccgaaacgt     |
|                                  | 3481 | .....                                                           |
| pET22b (+)-BSLA<br>pet22b (+)-M1 | 3541 | ttggtggcgggaccagtgacgaaggcttgagcagggcgtgcaagattccgaataaccgca    |
|                                  | 3541 | .....                                                           |
| pET22b (+)-BSLA<br>pet22b (+)-M1 | 3601 | agcgacaggccgatcatcgtcgcgtccagcgaagcggctcctcgccgaaaatgaccag      |
|                                  | 3601 | .....                                                           |
| pET22b (+)-BSLA<br>pet22b (+)-M1 | 3661 | agcgtcgcggcacctgtcctacgagttgcatgataaagaagacagtcataagtgcggcg     |
|                                  | 3661 | .....g.....                                                     |
| pET22b (+)-BSLA<br>pet22b (+)-M1 | 3721 | acgatagtcatgccccgcgccaccggaaggagctgactgggttgaagctctcaagggc      |
|                                  | 3721 | .....                                                           |
| pET22b (+)-BSLA<br>pet22b (+)-M1 | 3781 | atcggctcgagatcccggctcctaataatgagtgagctaacttacattaattgcgttcgctca |
|                                  | 3781 | .....                                                           |

|                                  |      |                                                                                |
|----------------------------------|------|--------------------------------------------------------------------------------|
| pET22b (+)-BSLA<br>pet22b (+)-M1 | 3841 | ctgcccgcgtttccagtcgggaaacctgtcgtgccagctgcattaatgaatcggccaacgc<br>3841 .....    |
| pET22b (+)-BSLA<br>pet22b (+)-M1 | 3901 | gcggggagagcggtttgctattgggcgccagggtggtttttcttttcaccagtggagc<br>3901 .....       |
| pET22b (+)-BSLA<br>pet22b (+)-M1 | 3961 | gggcaacagctgattgcccttcaccgcctggccctgagagagttgcagcaagcgggtccac<br>3961 .....    |
| pET22b (+)-BSLA<br>pet22b (+)-M1 | 4021 | gctggtttgccccagcagcgcaaaatcctggttgatgggtggttaacggcgggataaaca<br>4021 .....     |
| pET22b (+)-BSLA<br>pet22b (+)-M1 | 4081 | tgagctgtcttcggtatcgtcgtatcccactaccgagatatccgcaccaacgcgcagccc<br>4081 .....     |
| pET22b (+)-BSLA<br>pet22b (+)-M1 | 4141 | ggactcggtaatggcgcgcattgcgccagcgcctatctgatcgttggcaaccagcatcgc<br>4141 .....     |
| pET22b (+)-BSLA<br>pet22b (+)-M1 | 4201 | agtgggaacgatgcctcattcagcatttgcattggttggtaaaccggacatggcact<br>4201 .....        |
| pET22b (+)-BSLA<br>pet22b (+)-M1 | 4261 | ccagtcgccttcccgttccgctatcggctgaatttgattgcgagtgagatatttatgcca<br>4261 .....     |
| pET22b (+)-BSLA<br>pet22b (+)-M1 | 4321 | gccagccagacgcagacgcgccgagacagaacttaatgggccgcctaacagcgcgatttg<br>4321 .....     |
| pET22b (+)-BSLA<br>pet22b (+)-M1 | 4381 | ctggtgaccaatgcgaccagatgctccacgccagtcgctaccgtcttcatgggagaa<br>4381 .....        |
| pET22b (+)-BSLA<br>pet22b (+)-M1 | 4441 | aataaactgttgatgggtgtctggtcagagacatcaagaaataacgccggaacattagt<br>4441 .....      |
| pET22b (+)-BSLA<br>pet22b (+)-M1 | 4501 | gcaggcagcttccacagcaatggcatcctggtcatccagcggatagttaatgatcagccc<br>4501 .....     |
| pET22b (+)-BSLA<br>pet22b (+)-M1 | 4561 | actgacgcgttgccgcgagaagattgtgcaccgccgctttacaggcttcgacgccgcttcg<br>4561 ..c..... |
| pET22b (+)-BSLA<br>pet22b (+)-M1 | 4621 | ttctaccatcgacaccaccacgcgtggcaccacagttgatcggcgcgagatttaacgcgcc<br>4621 .....    |
| pET22b (+)-BSLA<br>pet22b (+)-M1 | 4681 | gacaatttgcgacggcgcgtgcagggccagactggagggtggcaacgcaccaatcagcaacga<br>4681 .....  |
| pET22b (+)-BSLA<br>pet22b (+)-M1 | 4741 | ctggttgcgccagttgtgtgccacgcggttgggaatgtaattcagctccgcacatcgc<br>4741 .....t..... |
| pET22b (+)-BSLA<br>pet22b (+)-M1 | 4801 | cgcttccacttttcccgcgttttcgcagaaacgtggctggcctggttcaccacgcggga<br>4801 .....      |
| pET22b (+)-BSLA<br>pet22b (+)-M1 | 4861 | aacggtctgataagagacaccggcatactctgcgacatcgtataacggttactggtttcac<br>4861 .....    |
| pET22b (+)-BSLA<br>pet22b (+)-M1 | 4921 | atcaccaccctgaattgactctcttccgggcgctatcatgccataccgcgaaaggtttt<br>4921 .....      |
| pET22b (+)-BSLA<br>pet22b (+)-M1 | 4981 | gcgccattcgatggtgtccgggatctcgcagcctctcccttatgcgactcctgcattagga<br>4981 .....    |
| pET22b (+)-BSLA<br>pet22b (+)-M1 | 5041 | agcagcccagtagtaggtgagggcgttgagcaccgcccgccgaaggaatggtgcatgca<br>5041 .....      |
| pET22b (+)-BSLA<br>pet22b (+)-M1 | 5101 | aggagatggcgcaccaacagtcctccggccacgggctgccaccataaccacgcgcaaac<br>5101 .....      |
| pET22b (+)-BSLA<br>pet22b (+)-M1 | 5161 | aagcgtcatgagcccgaagtggcgagcccgatcttcccacatcgggtgatgtcggcgatat<br>5161 .....    |

|                  |      |                                                                |
|------------------|------|----------------------------------------------------------------|
| pET22b (+) -BSLA | 5221 | aggcgccagcaaccgcacctgtggcgccggtgatgccggccacgatgcggtccggcgtaga  |
| pet22b (+) -M1   | 5221 | .....                                                          |
| pET22b (+) -BSLA | 5281 | ggatcgagatctcgatcccgcgaaattaatacgactcactataggggaattgtgagcgga   |
| pet22b (+) -M1   | 5281 | .....                                                          |
| pET22b (+) -BSLA | 5341 | taacaattcccctctagaaaataattttgtttaactttaagaaggagatatacatatgaaa  |
| pet22b (+) -M1   | 5341 | .....                                                          |
| pET22b (+) -BSLA | 5401 | tacctgctgccgaccgctgctgctggtctgctgctcctcgctgccagccggcgatggcc    |
| pet22b (+) -M1   | 5401 | .....                                                          |
| pET22b (+) -BSLA | 5461 | atggatatcgctgaacacaatccagtcgttatggttcacggtattggaggggcatcattc   |
| pet22b (+) -M1   | 5461 | .....                                                          |
| pET22b (+) -BSLA | 5521 | aattttgcgggaattaagagctatctcgtatctcagggctggctcgggacaagctgtat    |
| pet22b (+) -M1   | 5521 | .....                                                          |
| pET22b (+) -BSLA | 5581 | gcagttgatttttgggacaagacaggcacaattataacaatggaccggtattatcacga    |
| pet22b (+) -M1   | 5581 | .....                                                          |
| pET22b (+) -BSLA | 5641 | tttgtcaaaaaggttttagatgaaacgggtgcgaaaaagtggatattgtcgtcacagc     |
| pet22b (+) -M1   | 5641 | .....                                                          |
| pET22b (+) -BSLA | 5701 | atggggggcgcgcaacacactttactacataaaaaatctggacggcggaataaagttgca   |
| pet22b (+) -M1   | 5701 | .....                                                          |
| pET22b (+) -BSLA | 5761 | aacgtcgtgacgcttggcgccgcaaccggttgacgacaggcaaggcgcttccgggaaca    |
| pet22b (+) -M1   | 5761 | .....                                                          |
| pET22b (+) -BSLA | 5821 | gatccaaatcaaaaagattttatacacatccatttacagcagtgccgatatgattgtcatg  |
| pet22b (+) -M1   | 5821 | .....                                                          |
| pET22b (+) -BSLA | 5881 | aattacttatcaagattagatggtgctagaaaacggttcaaatccatggcggttgacacatc |
| pet22b (+) -M1   | 5881 | .....                                                          |
| pET22b (+) -BSLA | 5941 | ggccttctgtacagcagccaagtcaacagcctgattaagaagggtgaacggcgggggc     |
| pet22b (+) -M1   | 5941 | .....                                                          |
| pET22b (+) -BSLA | 6001 | cagaatacgaattaa                                                |
| pet22b (+) -M1   | 6001 | .....                                                          |

# pHY-scarlsberg & pHYM1-scarlsberg

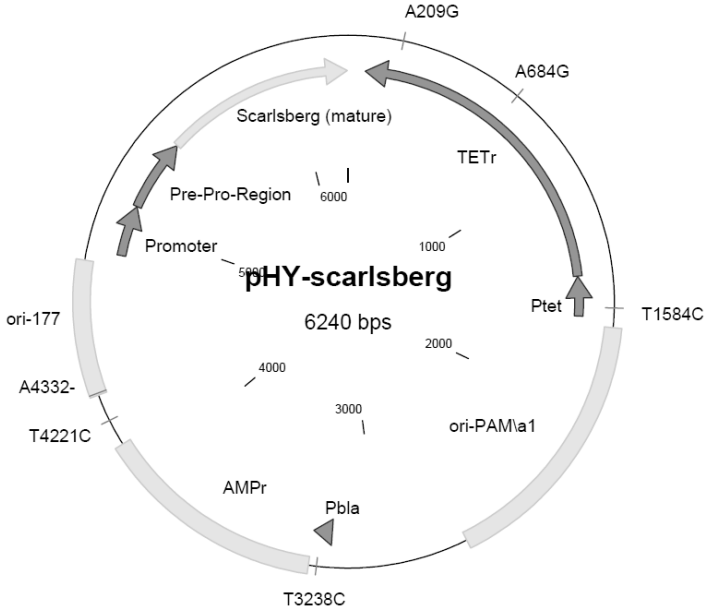



|                  |      |                                                               |
|------------------|------|---------------------------------------------------------------|
| pHY-scarlsberg   | 1    | cataccccggaattcctgttataaaaaaggatcaatTTTgaactctctcccaaagttg    |
| pHY M1-scarlsber | 1    | .....                                                         |
| pHY-scarlsberg   | 61   | atcccttaacgatttagaaatccctttgagaatgTTTatatacattcaaggtaccagcc   |
| pHY M1-scarlsber | 61   | .....                                                         |
| pHY-scarlsberg   | 121  | aactaatgacaatgattcctgaaaaagtaataacaaattactatacagataagttgact   |
| pHY M1-scarlsber | 121  | .....                                                         |
| pHY-scarlsberg   | 181  | gatcaacttccataggtacaacctTTTgatcaagtaagggtatggataataaacaccta   |
| pHY M1-scarlsber | 181  | .....g.....                                                   |
| pHY-scarlsberg   | 241  | caattgcaatacctgttccctctgataaaaagctggtaaagttaagcaaacctattccag  |
| pHY M1-scarlsber | 241  | .....                                                         |
| pHY-scarlsberg   | 301  | caccagcttctgctgtttcaagctacttgaacaattgTTTgatataactgTTTggtga    |
| pHY M1-scarlsber | 301  | .....                                                         |
| pHY-scarlsberg   | 361  | acgaaagccacctaatacaaatatcattataattgtcatgaacatgatgTTTtctta     |
| pHY M1-scarlsber | 361  | .....                                                         |
| pHY-scarlsberg   | 421  | aaagaaaggaagcagttaaaagctaacagaaagaaatgtaactccgatgTTTaacagt    |
| pHY M1-scarlsber | 421  | .....                                                         |
| pHY-scarlsberg   | 481  | ataaaggaccttctctatcaacaagtatcccaccaatgtagccgaaataatgacactca   |
| pHY M1-scarlsber | 481  | .....                                                         |
| pHY-scarlsberg   | 541  | ttgttccaggaaaataattacacttccgatttccgagcacttagctggtgaacatctt    |
| pHY M1-scarlsber | 541  | .....                                                         |
| pHY-scarlsberg   | 601  | tcatcatataaggaacctagagacaaaccctgctactgTTTccaaatataattccccac   |
| pHY M1-scarlsber | 601  | .....                                                         |
| pHY-scarlsberg   | 661  | aaagaactccaatcataaaaggtatattTTTccctaataccgggatcaacaaaaggatctg |
| pHY M1-scarlsber | 661  | .....g.....                                                   |
| pHY-scarlsberg   | 721  | ttactttctgatatgTTTtacaatatcaggaatgacagcacgctaacgataagaaaag    |
| pHY M1-scarlsber | 721  | .....                                                         |
| pHY-scarlsberg   | 781  | aaatgctatatgatgTTTgtaaacacataaaaaatacaatgcctacagacattagtataa  |
| pHY M1-scarlsber | 781  | .....                                                         |
| pHY-scarlsberg   | 841  | ttcctttgatatacaaatgacctTTTtacccttcttcttctttaaataatttcataagaa  |
| pHY M1-scarlsber | 841  | .....                                                         |
| pHY-scarlsberg   | 901  | acggaacagtataattgTTTatcataggaatgagtagaagataggaccaatgaatataat  |
| pHY M1-scarlsber | 901  | .....                                                         |
| pHY-scarlsberg   | 961  | ggctatcattcccaaatcgctggaccgactccttctcccatggctactatcgatccaa    |
| pHY M1-scarlsber | 961  | .....                                                         |
| pHY-scarlsberg   | 1021 | taagaccaaagtcttaccctattTTTccttggaaatagcgcgcaactacaaccatta     |
| pHY M1-scarlsber | 1021 | .....                                                         |

|                  |      |                                                                        |
|------------------|------|------------------------------------------------------------------------|
| PHY-scarlsberg   | 1081 | cgagtgtggaatgcagctgcaccagccccttgaataaaaacgagccataataagtaagg            |
| PHY M1-scarlsber | 1081 | .....                                                                  |
| PHY-scarlsberg   | 1141 | aaaagaagaatggccaacaacccaattaccgaccgaaacaatttattataattccaa              |
| PHY M1-scarlsber | 1141 | .....                                                                  |
| PHY-scarlsberg   | 1201 | ataggagtaaccttttgatgcctaattgatcagatagctttccatatacagctgttccaa           |
| PHY M1-scarlsber | 1201 | .....                                                                  |
| PHY-scarlsberg   | 1261 | tggaaaaggttaacataaaggctgtgttcaccagtttgtactcgcaggtggtttattaa            |
| PHY M1-scarlsber | 1261 | .....                                                                  |
| PHY-scarlsberg   | 1321 | aatcatttgcaatatcaggtaatgagacgttcaaaaccatttcatttaatacgtataaaa           |
| PHY M1-scarlsber | 1321 | .....                                                                  |
| PHY-scarlsberg   | 1381 | aagataaaatgcaaagcacaattaaaatttgggtgtgtcgtaaattcgattgtgaatagg           |
| PHY M1-scarlsber | 1381 | .....                                                                  |
| PHY-scarlsberg   | 1441 | atgtattcacatttcaccctccaataatgagggcagacgtagtattatagggtaatagata          |
| PHY M1-scarlsber | 1441 | .....                                                                  |
| PHY-scarlsberg   | 1501 | cgcttccctcttttaattgaacctgttacattcattattcattacacttcataaataat            |
| PHY M1-scarlsber | 1501 | .....                                                                  |
| PHY-scarlsberg   | 1561 | tctcctaaacttgattaaaaca <sup>T</sup> tttaccacataaaactaagttttaaattcagatt |
| PHY M1-scarlsber | 1561 | ..... <sup>C</sup> .....                                               |
| PHY-scarlsberg   | 1621 | tcatcacttatacaacaatatggcccgtttgttgaactactctttaataaaataatTTTT           |
| PHY M1-scarlsber | 1621 | .....                                                                  |
| PHY-scarlsberg   | 1681 | cggttccaattccacattgcaataatagaaaatccatcttcacggtttttcgtcatc              |
| PHY M1-scarlsber | 1681 | .....                                                                  |
| PHY-scarlsberg   | 1741 | atctgtatgaatcaaatcgcttcttctgtgtcatcaaggtttaattttttatgtatttc            |
| PHY M1-scarlsber | 1741 | .....                                                                  |
| PHY-scarlsberg   | 1801 | ttttaaaaaccaccatagagattaaccttttacggtgtaaaccttccccaatcaga               |
| PHY M1-scarlsber | 1801 | .....                                                                  |
| PHY-scarlsberg   | 1861 | caaacgtttcaaatcttttcttcatcatcggtcataaaatccgatatcctttacaggata           |
| PHY M1-scarlsber | 1861 | .....                                                                  |
| PHY-scarlsberg   | 1921 | tttgcagtttcgtcaattgccgattgtatccgatttatattttttcgtcgaat                  |
| PHY M1-scarlsber | 1921 | .....                                                                  |
| PHY-scarlsberg   | 1981 | catttgaacttttacatttgatcatagtctaatttcattgcctttttccaaaattgaat            |
| PHY M1-scarlsber | 1981 | .....                                                                  |
| PHY-scarlsberg   | 2041 | ccattgtttttgattcacgtagttttctgtattctttaaataagttggttccacacatac           |
| PHY M1-scarlsber | 2041 | .....                                                                  |
| PHY-scarlsberg   | 2101 | caatacatgcatgtgctgattataagaattatctttattttattgtcacttccggtgc             |
| PHY M1-scarlsber | 2101 | .....                                                                  |
| PHY-scarlsberg   | 2161 | acgcataaaaccaacaagatttttattaattttttatattgcatcattcggcgaatcc             |
| PHY M1-scarlsber | 2161 | .....                                                                  |
| PHY-scarlsberg   | 2221 | ttgagccatatctgacaaactcttatttaattcttcgccatcataaacatttttaactgt           |
| PHY M1-scarlsber | 2221 | .....                                                                  |
| PHY-scarlsberg   | 2281 | taatgtgagaaacaaccaacgaactgttggttttgtttaataacttcagcaacaacctt            |
| PHY M1-scarlsber | 2281 | .....                                                                  |
| PHY-scarlsberg   | 2341 | ttgtgactgaatgccatgtttcattgctctcctccagttgcacattggacaaagcctgga           |
| PHY M1-scarlsber | 2341 | .....                                                                  |
| PHY-scarlsberg   | 2401 | tttaaaaaccacactcgatacaactttctttcgcctgtttcacgattttgtttatactc            |
| PHY M1-scarlsber | 2401 | .....                                                                  |

pHY-scarlsberg 2461 taatatttcagcacaatcttttactctttcagcctttttaattcaagaatatgcagaag  
 pHY M1-scarlsber 2461 .....  
 pHY-scarlsberg 2521 ttcaaagtaatcaacattagcgattttctttctctccatgggtctcacttttccactttt  
 pHY M1-scarlsber 2521 .....  
 pHY-scarlsberg 2581 tgtcttgccactaaaacccttgatttttcatctgaataaatgctactattaggacacat  
 pHY M1-scarlsber 2581 .....  
 pHY-scarlsberg 2641 aatattaaagaagaacccccatctatttagttatttggttggtcacttataactttaacag  
 pHY M1-scarlsber 2641 .....  
 pHY-scarlsberg 2701 atggggttttctgtgcaaccaattttaagggttttcaatactttaaaacacatacatac  
 pHY M1-scarlsber 2701 .....  
 pHY-scarlsberg 2761 caacacttcaacgcacctttcagcaactaaaataaaaatgacgttatttctatatgtatc  
 pHY M1-scarlsber 2761 .....  
 pHY-scarlsberg 2821 aagataagaaagaacaagttcaaaaacctcaaaaaagacaccttttcagggtgctttttt  
 pHY M1-scarlsber 2821 .....  
 pHY-scarlsberg 2881 tattttataaactcattccctgatctcgacttctgttcttttttacctctcggttatgag  
 pHY M1-scarlsber 2881 .....  
 pHY-scarlsberg 2941 ttagttcaaattcgttcttttaggttctaaatcggtttttcttgggaattgtgctgttt  
 pHY M1-scarlsber 2941 .....  
 pHY-scarlsberg 3001 taccctttaccttgctcaaaaacccttaaaaacgtttttaaggcttttaagccgtctg  
 pHY M1-scarlsber 3001 .....  
 pHY-scarlsberg 3061 tacgttccttaaggaattattccttagtgctttctaggttaatgtcatgataataatggt  
 pHY M1-scarlsber 3061 .....  
 pHY-scarlsberg 3121 ttcttagacgtcaggtggcacttttcggggaaatgtgcgcggaaccctatttgtttatt  
 pHY M1-scarlsber 3121 .....  
 pHY-scarlsberg 3181 ttctaaatacattcaaatatgtatccgctcatgagacaataaccctgataaatgctca  
 pHY M1-scarlsber 3181 .....  
 pHY-scarlsberg 3241 ataatatgaaaaaggaagagtatgagtattcaacatttccgtgtcgccttattccctt  
 pHY M1-scarlsber 3241 .....  
 pHY-scarlsberg 3301 ttttgcgcattttgccttctgtttttgctcaccagaaaacgctggtgaaagtaaaaga  
 pHY M1-scarlsber 3301 .....  
 pHY-scarlsberg 3361 tgctgaagatcagttgggtgcacgagtggttacatcgaactggatctcaacagcggtaa  
 pHY M1-scarlsber 3361 .....  
 pHY-scarlsberg 3421 gatccttgagagtttgcgcccgaagaacgtttccaatgatgagcacttttaagttct  
 pHY M1-scarlsber 3421 .....  
 pHY-scarlsberg 3481 gctatgtggcgggtattatcccggttgacgcccggcaagagcaactcggtcgccgat  
 pHY M1-scarlsber 3481 .....  
 pHY-scarlsberg 3541 aactattctcagaatgacttggttgagtactcaccagtcacagaaaagcatcttacgga  
 pHY M1-scarlsber 3541 .....  
 pHY-scarlsberg 3601 tggcatgacagtaagagaattatgcagtgctgcataaacatgagtgataaacactgcggc  
 pHY M1-scarlsber 3601 .....  
 pHY-scarlsberg 3661 caacttacttctgacaacgatcggaggaccgaaggagctaacccgtttttgcacaacat  
 pHY M1-scarlsber 3661 .....  
 pHY-scarlsberg 3721 ggggatcatgtaactcgcttgatcggtgggaaccggagctgaatgaagccataccaaa  
 pHY M1-scarlsber 3721 .....  
 pHY-scarlsberg 3781 cgacgagcgtgacaccacgatgcctgcagcaatggcaacaacgttgcgcaactattaac  
 pHY M1-scarlsber 3781 .....

|                  |      |                                                               |
|------------------|------|---------------------------------------------------------------|
| pHY-scarlsberg   | 3841 | tggcgaactacttactctagcttcccggcaacaattaatagactggatggaggcggataa  |
| pHY M1-scarlsber | 3841 | .....                                                         |
| pHY-scarlsberg   | 3901 | agttgcaggaccacttctgcgctcgcccttccggctggctggtttattgctgataaatc   |
| pHY M1-scarlsber | 3901 | .....                                                         |
| pHY-scarlsberg   | 3961 | tggagccggtgagcgtgggtctcgcggtatcattgcagcactggggccagatggtaagcc  |
| pHY M1-scarlsber | 3961 | .....                                                         |
| pHY-scarlsberg   | 4021 | ctcccgatcgtagttatctacacgacgggagtcaggcaactatggatgaacgaaatag    |
| pHY M1-scarlsber | 4021 | .....                                                         |
| pHY-scarlsberg   | 4081 | acagatcgctgagatagggtcctcactgattaagcattggtaactgtcagaccaagtta   |
| pHY M1-scarlsber | 4081 | .....                                                         |
| pHY-scarlsberg   | 4141 | ctcatatatacttttagattgatttaaaacttcatttttaatttaaaaggatctaggtgaa |
| pHY M1-scarlsber | 4141 | .....                                                         |
| pHY-scarlsberg   | 4201 | gatcctttttgataatctcatgaccaaatacccttaacgtgagttttcgttccactgagc  |
| pHY M1-scarlsber | 4201 | .....c.....                                                   |
| pHY-scarlsberg   | 4261 | gtcagacccttaataagatgatcttcttgagatcgttttggctctgcgctaactctcttg  |
| pHY M1-scarlsber | 4261 | .....                                                         |
| pHY-scarlsberg   | 4321 | ctctgaaaacgaaaaaaccccttgcagggaggtttttcgaaggttctctgagctaccaa   |
| pHY M1-scarlsber | 4321 | .....                                                         |
| pHY-scarlsberg   | 4381 | ctctttgaaccgaggttaactggcttggaggagcgcagtcaccaaacttgctcttcagt   |
| pHY M1-scarlsber | 4380 | .....                                                         |
| pHY-scarlsberg   | 4441 | ttagccttaaccggcgcgatgacttcaagactaactcctctaatacaattaccagtggctg |
| pHY M1-scarlsber | 4440 | .....                                                         |
| pHY-scarlsberg   | 4501 | ctgccagtgggtgcttttgcatgtcttccgggttgactcaagacgatagttaccggata   |
| pHY M1-scarlsber | 4500 | .....                                                         |
| pHY-scarlsberg   | 4561 | aggcgcagcggctcggactgaacgggggttcgtgcatacagtcacagcttgagcgaactg  |
| pHY M1-scarlsber | 4560 | .....                                                         |
| pHY-scarlsberg   | 4621 | cctaccggaaactgagtgctcaggcgtggaatgagacaaacgcccataacagcggaaatg  |
| pHY M1-scarlsber | 4620 | .....                                                         |
| pHY-scarlsberg   | 4681 | acaccgtaaacgaaaggcaggaacagggagcgcacgagggagccgcccaggggaaac     |
| pHY M1-scarlsber | 4680 | .....                                                         |
| pHY-scarlsberg   | 4741 | gcctggtatctttatagtcctgtcgggtttcgccaccactgatttgagcgtcagatttcg  |
| pHY M1-scarlsber | 4740 | .....                                                         |
| pHY-scarlsberg   | 4801 | tgatgctgtcagggggcggagcctatggaaaaacggctttgccaagcttctagagat     |
| pHY M1-scarlsber | 4800 | .....                                                         |
| pHY-scarlsberg   | 4861 | ctgcaggtcgacggatccgacctcttccctgcaggtgaagcgtctattcatacttt      |
| pHY M1-scarlsber | 4860 | .....                                                         |
| pHY-scarlsberg   | 4921 | cgaactgaacatTTTTCTAAACAGTTATTAATAACCAAAAATTTAAATTGGTCCTCC     |
| pHY M1-scarlsber | 4920 | .....                                                         |
| pHY-scarlsberg   | 4981 | AAAAAATAGGCCTACCATATAATTCATTTTTTTCTATAATAAATTAACAGAATAATTG    |
| pHY M1-scarlsber | 4980 | .....                                                         |
| pHY-scarlsberg   | 5041 | GAATAGATTATATTATCCTTCTATTTAAATTATTCTGAATAAGAGGAGGAGAGTGAGTA   |
| pHY M1-scarlsber | 5040 | .....                                                         |
| pHY-scarlsberg   | 5101 | ATGATGAGGAAAAAGAGTTTTGGCTTGGGATGCTGACGGCCTTATGCTCGTGTTCACG    |
| pHY M1-scarlsber | 5100 | .....                                                         |
| pHY-scarlsberg   | 5161 | ATGGCATTCAAGCATTCCGCTTCTGCTGCTCAACCGCGAAAAATGTTGAAAAGGATTAT   |
| pHY M1-scarlsber | 5160 | .....                                                         |

pHY-scarlsberg 5221 attgtcggatttaagtcaggagtgaaaaccgcatctgtcaaaaaggacatcatcaaagag  
 pHY M1-scarlsber 5220 .....

pHY-scarlsberg 5281 agcggcggaaaagtggaacaagcagtttagaatcatcaacgaggcaaaagcgaagctagac  
 pHY M1-scarlsber 5280 .....

pHY-scarlsberg 5341 aaagaagcgccttaaggaagtcaaaaatgatccggatgtcgcttatgtggaagaggatcat  
 pHY M1-scarlsber 5340 .....

pHY-scarlsberg 5401 gtggcccatgcgctagcgcgcaaacggcttccttacggcattcctctcattaaagcggacaaa  
 pHY M1-scarlsber 5400 .....

pHY-scarlsberg 5461 gtgcaggctcaaggctttaaggagcgaatgtaaaagtagccgctcctggatacaggaatc  
 pHY M1-scarlsber 5460 .....

pHY-scarlsberg 5521 caagcttctcatccggacttgaacgtagtcggcggagcaagctttgtggctggcgaagct  
 pHY M1-scarlsber 5520 .....

pHY-scarlsberg 5581 tataacaccgacggcaacggacacggcacacatggtgccgtacagtagctgcgcttgac  
 pHY M1-scarlsber 5580 .....

pHY-scarlsberg 5641 aatacaacgggtgtattagcggttgcgccaagcgtatccttgtacgggttaaagtactg  
 pHY M1-scarlsber 5640 .....

pHY-scarlsberg 5701 aattcaagcgggaagcggatcatacagcggcattgtaagcggaaatcgagtggcgacaaca  
 pHY M1-scarlsber 5700 .....

pHY-scarlsberg 5761 aacggcatggatgttatcaatatgagccttgggggagcatcaggctcgacagcagatgaaa  
 pHY M1-scarlsber 5760 .....

pHY-scarlsberg 5821 caggcagtcgacaatgcatatgcaagaggggttgcgcttagctgcagcagggaaacagc  
 pHY M1-scarlsber 5820 .....

pHY-scarlsberg 5881 ggatcttcaggaaacacgaatacaattggctatcctgcgaaatacgattctgtcatcgct  
 pHY M1-scarlsber 5880 .....

pHY-scarlsberg 5941 gttggtcggtagactctaacagcaacagagcttcatcttccagcgtcggagcagagctt  
 pHY M1-scarlsber 5940 .....

pHY-scarlsberg 6001 gaagtcagtgctcctggcgcaggcgtatacagcacttacccaacgaacacttatgcaaca  
 pHY M1-scarlsber 6000 .....

pHY-scarlsberg 6061 ttgaacggaacgtcaatggcttctcctcatgtagcgggagcagcagcttgatcttgca  
 pHY M1-scarlsber 6060 .....

pHY-scarlsberg 6121 aaacatccgaaccttccagcttcacaagtccgcaaccgtctctccagcagcggcacttat  
 pHY M1-scarlsber 6120 .....

pHY-scarlsberg 6181 ttgggaagctccttctactatgggaaaggctctgatcaatgtcgaagctgccgctcaataa  
 pHY M1-scarlsber 6180 .....
